1 **Title:** Productivity definition of the chilling requirement reveals underestimation of the impact  
2 of climate change on winter chill accumulation

3 **Running head:** bud break control by temperature in fruit trees

4 José Antonio Campoy<sup>1</sup>, Rebecca Darbyshire<sup>2,3</sup>, Elisabeth Dirlewanger<sup>1</sup>, José Quero-García<sup>1</sup>,  
5 Bénédicte Wenden<sup>1</sup>

6 <sup>1</sup>INRA, UMR Biologie du Fruit et Pathologie, Univ. Bordeaux, Villenave d'Ormon, France;

7 <sup>2</sup>New South Wales Department of Primary Industries, Wagga Wagga, Australia. <sup>3</sup>Faculty of  
8 Veterinary and Agricultural Sciences, University of Melbourne, Melbourne, Australia

9 Corresponding author: [benedicte.wenden@inra.fr](mailto:benedicte.wenden@inra.fr) (Tel: +33 5 57 12 25 49)

10 Keywords: *Prunus avium*, sweet cherry, flowering, temperature, chill, phenology, projections

11 Type of paper: Primary research article

12

### 13 **Abstract**

14 Evaluation of chilling requirements (CR) of cultivars of temperate fruit trees provides key  
15 information to assess regional suitability, according to winter chill, for both industry expansion  
16 and ongoing profitability as climate change continues. Traditional methods for calculating CR  
17 use climate controlled chambers and define CR using a fixed budburst percentage, usually close  
18 to 50% (CR-50%), without considering the productivity level associated to this percentage. This  
19 CR-50% definition may underestimate the real CR of tree crops for optimal productivity. This  
20 underestimation is particularly important to consider as winter chill accumulation is declining  
21 in many regions due to climate change. In this work we used sweet cherry to analyse the  
22 traditional method for calculating CR in many Rosaceae species (CR-50%) and compared the  
23 results with more a restrictive, productivity focused method, with CR defined with a 90% bud

24 break level (90%, CR<sub>m</sub>-90%) close to the optimal budburst which assures productivity. Climate  
25 projections of winter chill suitability across Europe using CR-50% and CR<sub>m</sub>-90% were  
26 calculated. Regional suitability landscape was highly dependent on the method used to define  
27 CR and differences were found for a wide area of the European geography, both cold and mild  
28 winter areas. Our results suggest a need to use an optimal budburst level for the assessment of  
29 CR for sweet cherry. The use of traditional methods to determine CR can result in an  
30 underestimation of productivity CR with negative consequences for the fruit industry,  
31 particularly as climate change advances.

32

## 33 **Introduction**

34 Temperate deciduous fruit trees represent an important economic and food resource.  
35 Maintaining and expanding temperate fruit production is an industry priority and is likely to  
36 become more challenging under anthropogenic climate change. One aspect which will likely  
37 be influenced by climate change is sufficient accumulation of winter chilling (Luedeling *et al.*,  
38 2011). In temperate fruit trees, the timing of bud break and flowering is highly correlated with  
39 a proper release of endodormancy, or rest, which is controlled by an accumulation of cold  
40 temperatures in winter (Saure, 1985). During this rest period, a certain amount of cold  
41 temperatures, defined as the chilling requirement, must be accumulated prior to the bud being  
42 released from endodormancy. Subsequent to this, the bud will respond to heat, leading to  
43 flowering and vegetative bud break (Lang *et al.*, 1987). This period of rest prevents bud break  
44 in response to conditions suitable for growth conditions, such as a warm spell in winter, which  
45 would then expose sensitive tissues to subsequent damaging cold conditions. The consequences  
46 of insufficient accumulation of chill to meet cultivar chilling requirements have been  
47 extensively studied. Insufficient chill can delay flowering and bud break, cause substantial  
48 damage to bud development including deformed buds (Petri & Leite, 2004; Viti *et al.*, 2008),  
49 and induce low levels of vegetative bud break and lack of uniformity of leafing and bloom  
50 (Samish, 1953; Erez & Couvillon, 1987; Erez, 2000). Within the context of climate change,  
51 these sub-optimal production outcomes may become more frequent. To predict such potential  
52 impacts, assist with orchard climate adaptation and guide breeding strategies, evaluation of  
53 cultivar specific chilling requirements (CR) is needed (Dennis, 2003; Campoy *et al.*, 2011;  
54 Chuine *et al.*, 2016).

55 Precise determination of the CR is not possible under field conditions. As such, various  
56 experimental methods have been used to evaluate dormancy depth (Cook *et al.*, 2017; Vitra *et*  
57 *al.*, 2017), date of dormancy release (Dennis, 2003; Castède *et al.*, 2014; Dantec *et al.*, 2014;

58 Chmielewski & Götz, 2016) and to assess the relationship between bud break and chilling and  
59 forcing temperatures (Harrington *et al.*, 2010; Luedeling & Gassner, 2012; Andreini *et al.*,  
60 2014; Laube *et al.*, 2014). Forcing experiments using controlled climate chambers are  
61 commonly used to assess bud dormancy progression. This approach involves sampling tree  
62 cuttings through autumn and winter and evaluating bud break of the buds after they have been  
63 exposed to warm temperatures in a controlled climate chamber (Tabuenca, 1967; Dennis, 2003;  
64 Vitasse & Basler, 2014). In implementing this approach two main criteria have been used to  
65 determine CR; percentage of floral or vegetative bud break within a given period of time in the  
66 chamber (e.g. 50% break after 10 days) and the time required in the forcing chamber to reach a  
67 given stage of development (e.g. bud break) (Saure, 1985; Dennis, 2003). Of the two  
68 approaches, the former is often employed with the criteria to determine CR by allocating CR as  
69 when in-field chill accumulation leads to a 30-50% of bud break after 7 to 10 days in the forcing  
70 chamber (Hauage & Cummins, 1991; Ruiz *et al.*, 2007; Viti *et al.*, 2010; Campoy *et al.*, 2012;  
71 Castède *et al.*, 2014). This criteria can vary by study with for instance, CR being determined  
72 using the emergence of only 3-4 flowers in the forcing chamber (Chmielewski & Götz, 2016;  
73 Götz *et al.*, 2017).

74 These criteria may not adequately represent CR that are required for profitable fruit production,  
75 in particular for crops which require high conversion of floral buds to fruit (e.g. cherry). These  
76 systems rely on high and consistent bud break rates which set a high production potential. Poor  
77 rates of floral and vegetative bud break, that is the proportion of floral and vegetative buds that  
78 truly open, can have a major impact on temperate fruit crop productivity (Erez, 2000). For small  
79 fruits, such as sweet cherry, a large number of viable flowers is required to reach commercial  
80 productivity, with a maximum bloom level desirable. Therefore, setting a CR value which only  
81 leads to 30-50% bud break may underestimate the CR needed for commercial profitability. This  
82 in turn will misjudge the potential impact of climate change on cherry production.

83 In this work, one of the most commonly employed forcing method in temperate fruit trees (in-  
84 field chilling required to lead to 50% bud break after 10 days forcing) was used to assess CR in  
85 sweet cherry and was contrasted with a modified method that sets a higher bud break percentage  
86 to better match requirements for commercial profitability. CR determined using both these  
87 methods were used to create climate change projections of the potential impact of insufficient  
88 chill accumulation in cherry across Europe. This work emphasizes the need to evaluate CR in  
89 terms of the minimum requirement of chill for commercial viability to best prepare industry  
90 and breeding programs for expansion and climate change.

91

## 92 **Materials and methods**

### 93 *Bud break observations*

94 Four sweet cherry cultivars were chosen for analysis encapsulating a presumed range in chilling  
95 requirements based on flowering dates (Fig. 1). The trees used for the experiments were grown  
96 following commercial-orchard cultural practices in the fruit tree experimental orchard of the  
97 Institut National de la Recherche Agronomique (INRA)-Bordeaux research center, located in  
98 Bourran, in Lot-et-Garonne (France, 44°19'N 0°24'E, 70m asl) and 60 km away in Toulence,  
99 in Gironde (France, 44°34'N 0°16'W, 8m asl). Trees were grown on deep loamy soils, in mild  
100 winter regions with an average annual rainfall of 825 mm. Cultivars 'Cristobalina' and 'Regina'  
101 were grown in Bourran, 'Fertard' in Toulence and 'Burlat' in both sites. Dates for beginning of  
102 flowering (5-10% open flowers, BBCH 61; Fadón *et al.*, 2015) and maturity (BBCH 89) were  
103 recorded for the four cultivars between 2000 and 2017.

104 Each fortnight between 1<sup>st</sup> September and 8<sup>th</sup> April (2015-2016 and 2016-2017 seasons, except  
105 for 'Cristobalina' that was sampled only in 2015-2016), two or three branches bearing floral  
106 buds were randomly cut from the two trees per cultivar and placed in a climate-controlled  
107 chamber under forcing conditions (25°C, 16h light/8h dark). Branches were discarded when

108 buds were dry and/or necrotic, or when the proportion of open buds reached a plateau. Every  
109 two or three days the total number of floral buds that reached BBCH stage 55 (Fadón *et al.*,  
110 2015) was recorded. Bud break percentage was recorded as the percentage of flower buds at  
111 stage 55 in relation to the total number of floral buds on the branches.  
112

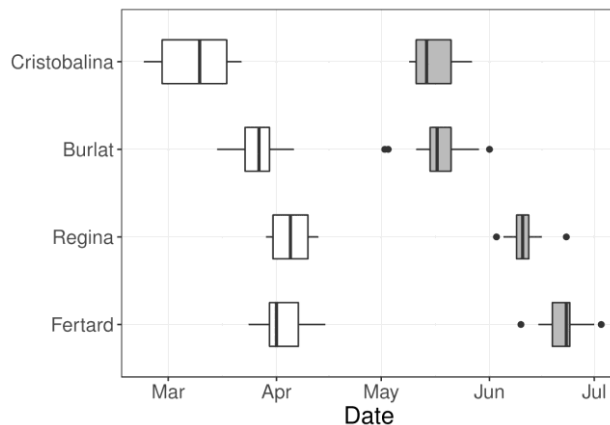

**Fig. 1** Range of flowering (white boxes) and maturity (grey boxes) dates for the four studied cultivars (2000 – 2017).

113

114

### 115 *Chill and heat accumulation estimation*

116 For the assessment of chill and heat accumulation, hourly mean temperatures were collected  
117 from the local weather stations (years 2015-2017, INRA CLIMATIK,  
118 <https://intranet.inra.fr/climatik>, stations 47038002 and 33533002).

119 Chill accumulation, namely chill portions (CP), was calculated using the Dynamic chill model  
120 (Fishman *et al.*, 1987), which has previously been found to be the best fitting chill model among  
121 several tested models (Albuquerque *et al.*, 2008; Luedeling *et al.*, 2009a). For heat  
122 accumulation, the growing degree hours (GDH) model was used (Anderson *et al.*, 1986). Chill  
123 was accumulated from October 1<sup>st</sup> until the sampling date. For climate projection analyses chill  
124 was accumulated between October 1<sup>st</sup> and March 31<sup>st</sup>.

125 To assess CR, two methods were used. Firstly, the commonly used approach which defined CR  
126 as the field accumulated chill which leads to 50% of the buds above stage BBCH 55 after 10  
127 days in forcing conditions (Ruiz *et al.*, 2007; Albuquerque *et al.*, 2008; Campoy *et al.*, 2012;

128 Sánchez-Pérez *et al.*, 2012; Azizi Gannouni *et al.*, 2017), hereby referred as CR-50%. For this  
129 study, the second method used a similar approach but set a higher bud break requirement, 90%,  
130 estimated as the maximum bud break percentage recorded after a prolonged forcing period (2-  
131 3 weeks), named here CR<sub>m</sub>-90%.

132

### 133 *Climatic and projection models data*

134 The R package ChillR (Luedeling *et al.*, 2013) was used to generate hourly temperatures from  
135 daily maximum and minimum temperatures which uses a sine curve and a logarithmic function  
136 for day-time and night-time temperatures, respectively. For the climate projection analyses, two  
137 European temperature gridded datasets were used. Two regional climate datasets for historical  
138 and projected temperature made available by EURO-CORDEX (<http://www.euro-cordex.net>;  
139 Jacob *et al.*, 2014): MOHC-HadGEM2-ES and NOAA-GFDL-GFDL-ESM2M, r1i1p1  
140 ensemble, regionalized using the SMHI-RCA4 regional change model (50 km resolution, EUR-  
141 44) were used for the assessment. Two emission scenarios (RCP 4.5 and RCP 8.5) were assessed  
142 for each climate model. We corrected the differences for the temperatures between euro-cordex  
143 projections and recorded data using the E-OBS gridded temperature dataset with 0.25°  
144 resolution (v.14; Haylock *et al.*, 2008). Gridded annual chill accumulation values were  
145 calculated for the three data sets (E-OBS, MOHC-HadGEM2\_ES and NOAA-GFDL-GFDL-  
146 ESM2M) for 1978-2005 and the average anomaly grid, defined as the difference between E-  
147 OBS and RCM datasets, was added to the chill accumulation grids calculated for the four RCM  
148 datasets (RCP 4.5 and RCP 8.5).

149 Safe winter chill (SWC; Luedeling *et al.*, 2009b) was used to estimate whether future European  
150 winter chilling conditions will likely be suitable for each cultivar and based on the CR estimated  
151 using the two methods. SWC is the amount of winter chill that can be reliably expected in 90%  
152 of all years, or the 10<sup>th</sup> percentile of the dataset. This metric is meaningful to fruit producers,

153 because failure to meet chilling requirements in more than 10% of years is likely to render  
154 production uneconomical (Luedeling *et al.*, 2009b).

155

## 156 **Results**

### 157 *Bud break percentage based on chill accumulation*

158 Bud break response to field accumulated chill prior to cuttings being taken was evaluated (Fig.  
159 2). Low - but not nil - bud break percentages were observed for branches that had been sampled  
160 in the early season (mid-November), suggesting that early ('Cristobalina') and mid-flowering  
161 ('Burlat') cultivars could respond to warm temperatures after the accumulation of only 13 CP.  
162 Although only a low percentage of bud break was observed (i.e. less than 5%). As more chill  
163 was accumulated in the field, the rate of floral bud break increased and the maximum bud break  
164 percentage, marked by the plateau for each line, was higher (Fig. 2). These results indicate that  
165 the amount of accumulated chill primarily drives bud break percentages as the buds were all  
166 exposed to similar levels of forcing temperatures (Fig. 2).

167 The bud break percentage to accumulated chill did notably differ between cultivars, not only in  
168 the rate of bud break with increasing chill but also in the final percentage of bud break (Figs 2  
169 and 3). For example, the early flowering cultivar 'Cristobalina' (i.e. low-chill cultivar) was  
170 found to have higher bud break potential (45% bud break) after low levels of accumulated chill  
171 (32 CP) whereas the late flowering (i.e. high-chill cultivar) cultivar 'Regina' only reached  
172 14.5% bud break after accumulating 32 CP. For the late flowering cultivars to meet the  
173 equivalent 45% bud break, 53 CP and 65 CP were needed for 'Regina' and 'Fertard',  
174 respectively. This pattern was also found for the capacity to reach high bud break percentage.  
175 After accumulating 40 CP, 'Cristobalina' and 'Burlat' reached 100% and 84% bud break  
176 respectively whereas late flowering cultivars ('Regina' and 'Fertard') only reached 28% and  
177 16% bud break, respectively (Fig. 3, Fig. S1). These differences are also noticeable for the bud



178 ability to respond to forcing conditions as revealed by the rate of bud break (Fig. 2). For  
179 example, for ‘Burlat’, bud break percentage increase markedly faster for branches that have  
180 accumulated at least 90 CP than for branches sampled earlier during chill accumulation.

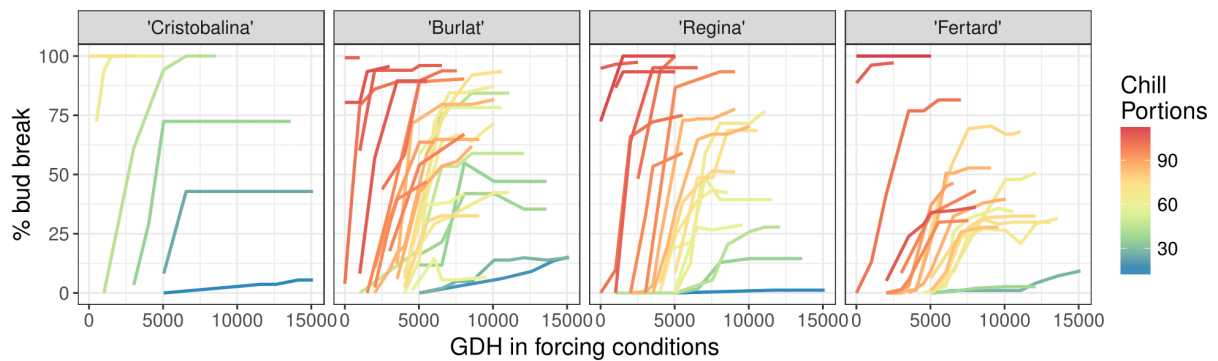

**Fig. 2** Floral bud break percentage for the four cultivars with various field chill accumulation values (in chill portions). Note that no results for ‘Cristobalina’ were recorded for chill accumulation greater than 69 CP as bud burst had begun in the field. GDH: growing degree hours.

181

### 182 *Chilling requirement calculation*

183 The chilling requirement for each cultivar was evaluated using the common approach (CR-  
184 50%; Fig. 3). Values calculated this way were highly variable between years with, for example,  
185 values of 77 to 91 CP found for ‘Burlat’ (Fig. 3, Table 1). CR were also calculated using a 90%  
186 bud break threshold (CR<sub>m</sub>-90%). Values for CR<sub>m</sub>-90% ranged between 42 CP for ‘Cristobalina’  
187 and 110 CP for ‘Fertard’ (Fig. 3, Table 1).

188 Taking the average chill portion accumulation to reach 50% and 90% bud break, CR for each  
 189 cultivar were estimated (Table 1). CR differs with cultivar and by the method used to evaluate  
 190 it but the CR estimated by CR<sub>m</sub>-90% are all higher than CR-50%.

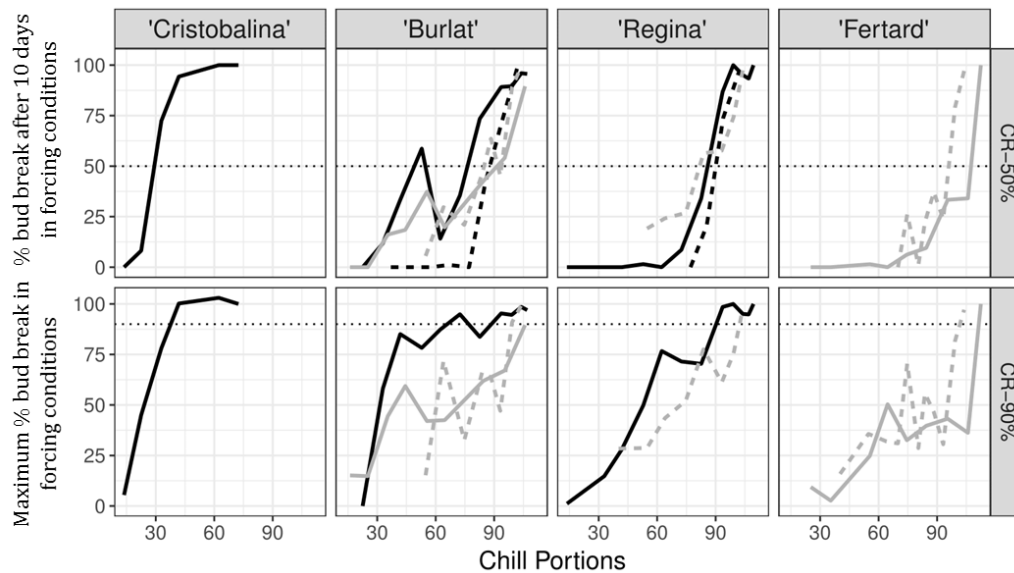

**Fig. 3** Bud break data used to calculate CR-50% and CRM-90%. Upper panel: bud break percentage after 10 days under forcing conditions; lower panel: maximal bud break percentage reached under forcing conditions. Horizontal dotted lines represent the 50% and 90% thresholds for CR-50% and CR<sub>m</sub>-90% respectively. Black and grey lines represent data for cultivars grown in Bourran and Toulonne, respectively. Solid lines are for 2015-2016 data while dashed lines are for 2016-2017 data.

191

**Table 1** Average chill requirement values differ between the four cultivars and the method used to calculate CR.

|                | CR-50%      | CR <sub>m</sub> -90% |
|----------------|-------------|----------------------|
| 'Cristobalina' | 29 CP       | 42 CP                |
| 'Burlat'       | 86 CP (±5)  | 92 CP (±15)          |
| 'Regina'       | 86 CP (±3)  | 99 CP (±5)           |
| 'Fertard'      | 101 CP (±5) | 108 CP (±4)          |

192

193 *Future production risk due to insufficient chill*

194 The risk of insufficient chill accumulation for each cultivar based on the two methods to  
 195 determine CR (Table 1) was estimated across Europe using two different climatic models and

196 two emission scenarios (Figs 4, 5, S2 and S3). We focused on MOHC-HadGEM2-ES, rcp8.5,  
197 projecting the highest increase in temperatures (most pessimistic; Fig. 4) and NOAA-GFDL-  
198 GFDL-ESM2M, rcp4.5, projecting the lowest increase in temperatures (most optimistic; Fig.  
199 5). Areas defined in Figures 4 and 5 reveal that for the four cultivars, the regions at risk of not  
200 meeting CR increase substantially out to 2075-2100 using both estimations of CR (CR-50%  
201 and CR<sub>m</sub>-90%). The area at risk is larger for CR<sub>m</sub>-90% than for CR-50% in both scenarios.  
202 Areas coloured in pink, show the areas meeting CR-50% but not CR<sub>m</sub>-90% (Figs 4 and 5).  
203 Therefore, pink areas show the difference of estimated potential risk of insufficient chill  
204 depending on the method used to define CR (either CR-50% or CR<sub>m</sub>-90%). The difference in  
205 risk based on CR methodology is especially evident for the high-chill cultivar 'Regina'. Under  
206 both scenarios, a large area of Europe will not meet CR<sub>m</sub>-90% whereas using CR-50% a much  
207 lower area of impact was found (Figs 4 and 5). For example, when considering CR-50%, sweet  
208 cherry production in United Kingdom appears assured for all cultivars whereas late cultivars as  
209 'Regina' may not receive enough chill to guarantee optimal bud break by 2075-2100. In the  
210 same line, Eastern European areas and Anatolia will not receive enough chilling for a high-chill  
211 cultivar such as 'Regina'. For an extra-low chill cultivar, such as 'Cristobalina', CR-50% will  
212 be met in almost all the Mediterranean basin, but chilling to fulfil CR<sub>m</sub>-90% may not be  
213 guaranteed in some areas of Southern Italy, Southern Spain and Northern Africa for 2026-2100.

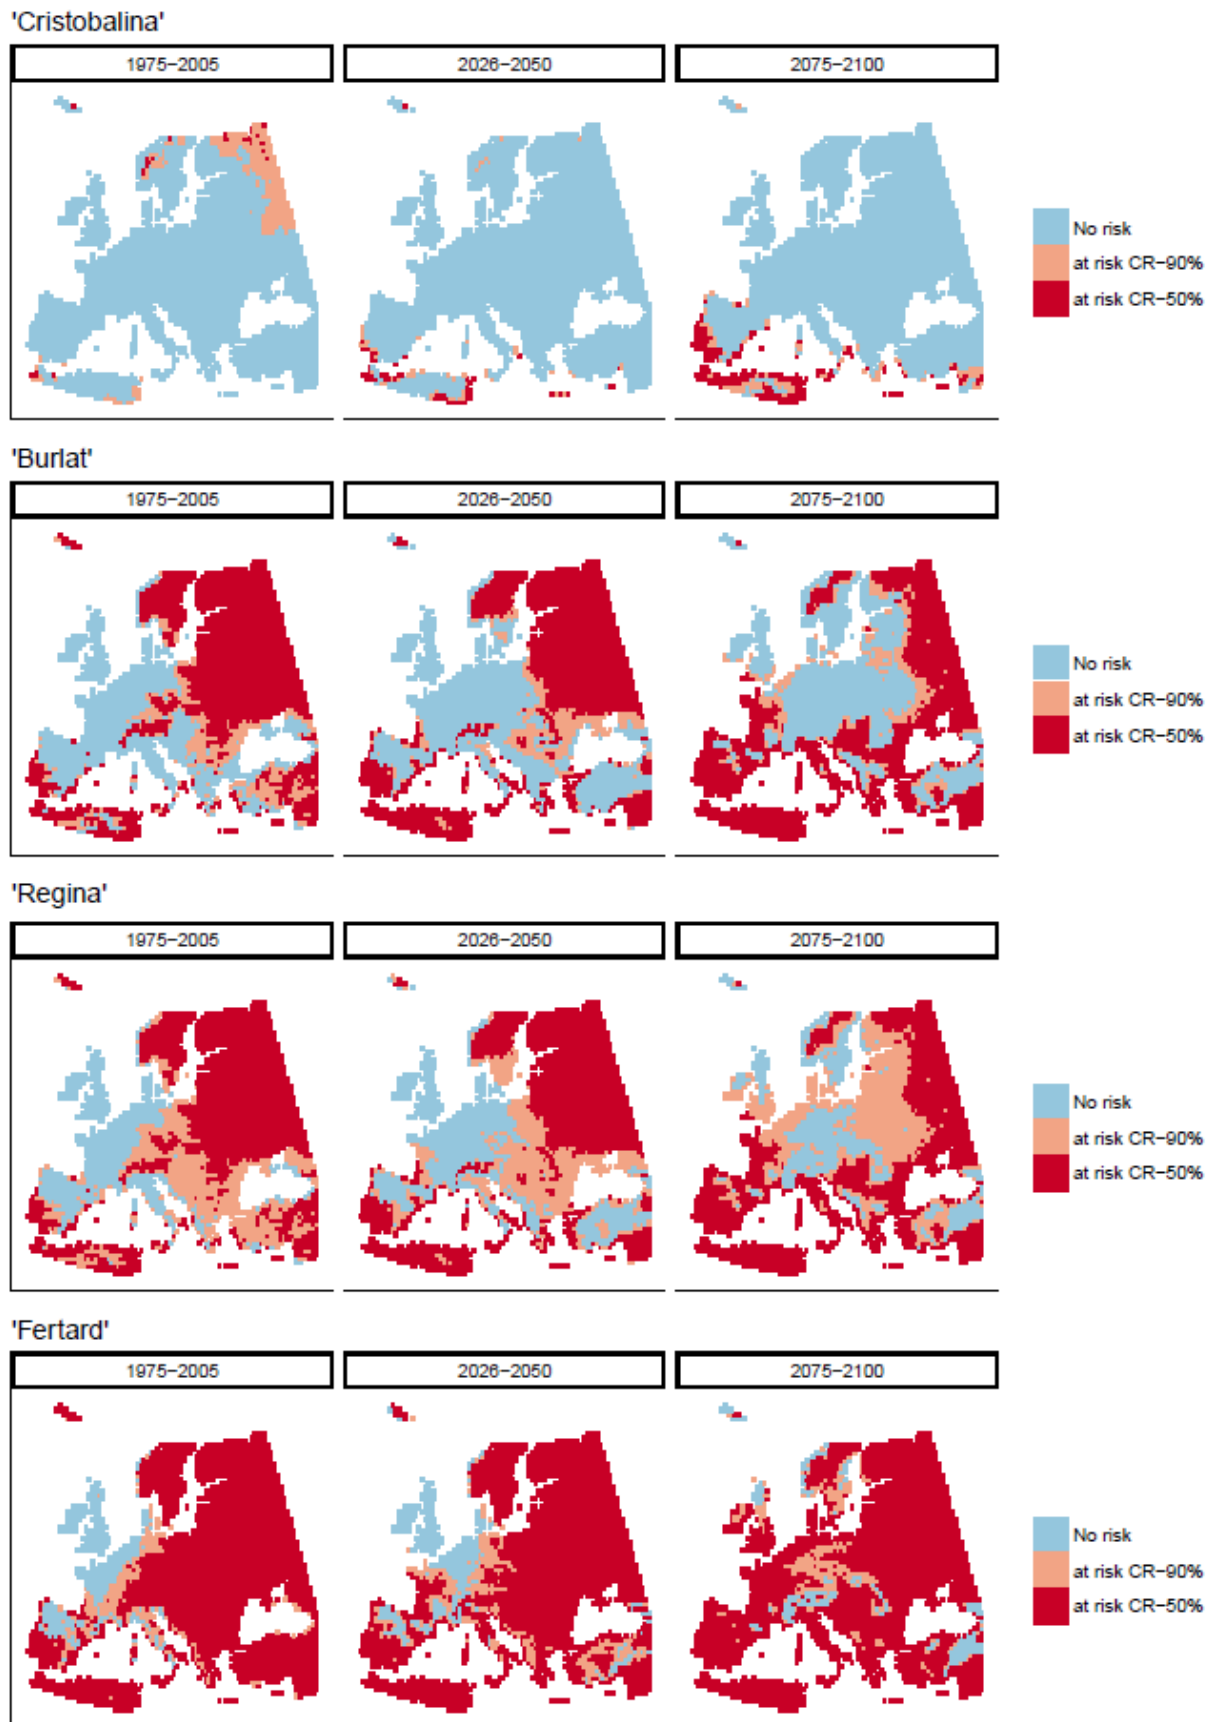

214

215 **Fig. 4** European maps showing where safe winter chill (10<sup>th</sup> percentile) will not meet chilling requirements as  
216 estimated by forcing experiments (CR-50%; red areas) and by optimal bud break rate (CR<sub>m</sub>-90%; pink and red  
217 areas) for the four cultivars. Blue indicates CR will be met for both CR values. Thresholds for the chilling

218 requirements calculated in Table 1 were used. Scenario MOHC-HadGEM2-ES, rcp8.5, projects the highest increase  
219 in temperatures (most pessimistic).

'Cristobalina'

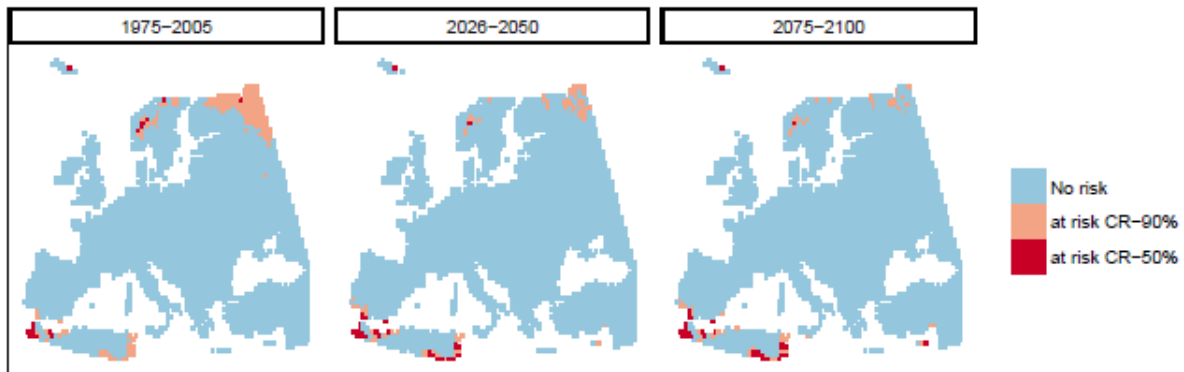

'Burlat'

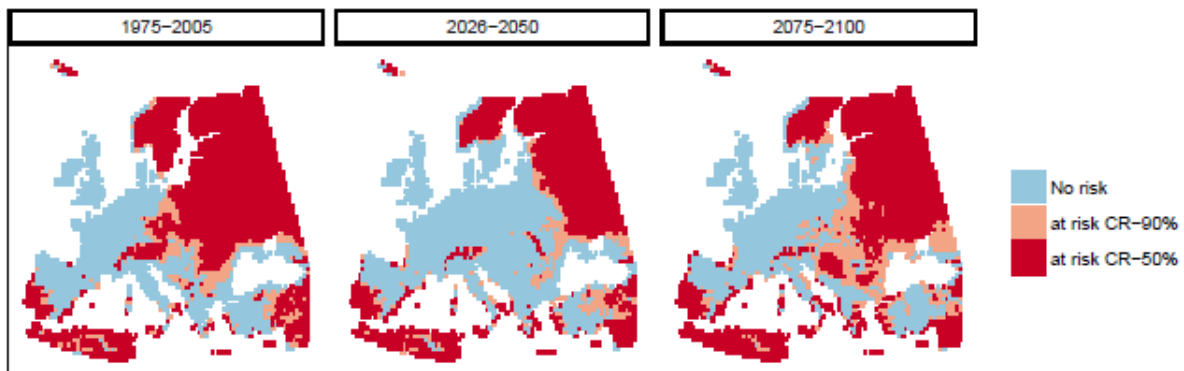

'Regina'

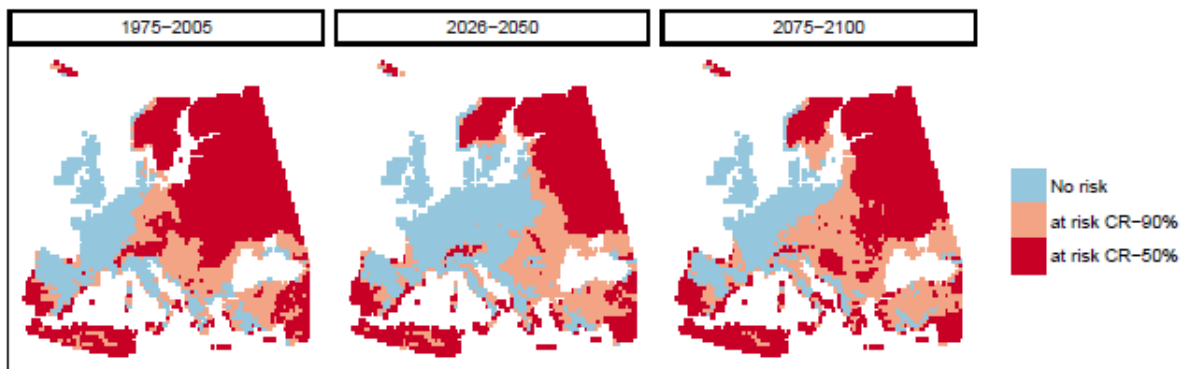

'Fertard'

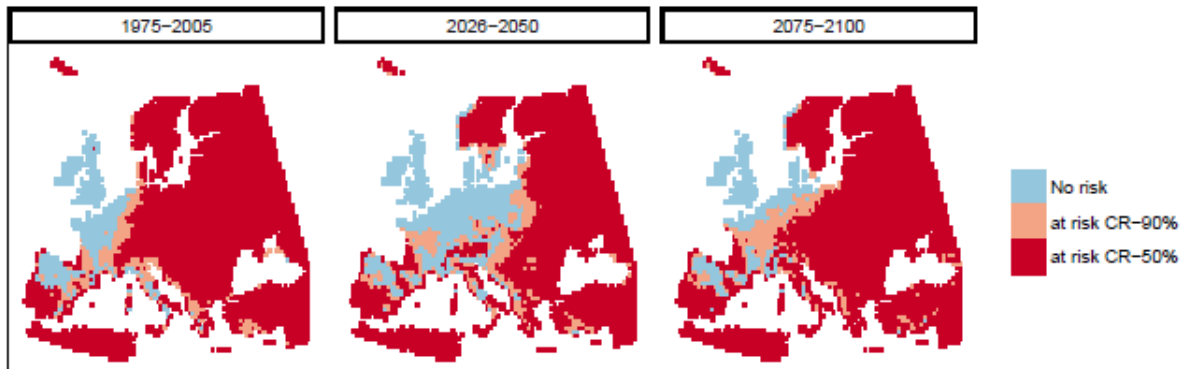

220

221 **Fig. 5** European maps showing where safe winter chill (10th percentile) will not meet chilling requirements as  
222 estimated by forcing experiments (CR-50%; red areas) and by optimal bud break rate (CRm-90%; pink and red  
223 areas) for the four cultivars. Blue indicates CR will be met for both CR values. Thresholds for the chilling  
224 requirements calculated in Table 1 were used. Scenario NOAA-GFDL-GFDL-ESM2M, rcp4.5, projects the lowest  
225 increase in temperatures (most optimistic).

226

## 227 **Discussion**

### 228 *Bud break percentage in response to chill accumulation*

229 We evaluated bud break responses to various levels of in-field chill accumulation using forcing  
230 experiments on cultivars with contrasting chill requirements. The rate of bud break gradually  
231 increased with in-field accumulated chill, thus confirming that chill primarily drives the  
232 capacity of the buds to burst, but with contrasted responses for the different cultivars. Following  
233 these observations, greater chill accumulation increased the maximum bud break percentage  
234 but with a different response between cultivars (Fig. 3). Overall, the results indicate that the  
235 amount of accumulated chill can greatly limit the percentage of bud break even under optimal  
236 growth conditions as illustrated by the response to chill and heat accumulation (Fig. S1). This  
237 is especially true of the early flowering cultivar ‘Cristobalina’ which shows a very strict control  
238 of bud break potential by the amount of chill accumulated with limited effect of heat  
239 accumulation (Fig. 4; Fig. S1). In addition, according to our data, there is a limit to the effect  
240 of heat on the bud break percentage. When bud break percentages were considered as a response  
241 to chill and heat accumulation (Fig. S1), results suggest that for a given chill accumulation bud  
242 break might never reach 100%. For example, bud break percentage in ‘Regina’ fails to reach  
243 60% if chill accumulation is under 60 CP regardless of the level of heat accumulated. This  
244 provides a clear chill requirement limit to obtain maximum bud break percentage suitable for  
245 commercial growing of sweet cherry.

246 The interaction of chilling with heat requirements and bud break was also shown in different  
247 temperate *Rosaceae*: cherry (Measham *et al.*, 2017), peach (Couvillon & Erez, 1985; Okie &  
248 Blackburn, 2011), sour cherry (Felker & Robitaille, 1985), apple (Powell, 1986) and pear  
249 (Spiegel-Roy & Halston, 1979); and in a notable group of forest species (Laube *et al.*, 2014).  
250 This interaction has been associated to a ‘residual effect of dormancy’ (Erez, 2000), a parameter  
251 indicating the distance to optimal chilling, and therefore, productivity (Okie & Blackburn,  
252 2011). This term is used when crops show symptoms of insufficient chilling (e.g. deficient bud  
253 break or fruit set and uneven foliation) even after satisfaction of their CR, usually corresponding  
254 to CR-30% or CR-50% (Campoy *et al.*, 2011). Therefore, increasing the required bud break  
255 percentage when assessing CR will provide a more reliable measure of profitable CR.  
256 Considering previous results reported in other temperate fruit species such as apricot (Viti *et*  
257 *al.*, 2010; Campoy *et al.*, 2012), peach (Romeu *et al.*, 2014), Japanese plum (Ruiz *et al.*, 2017),  
258 almond (Egea *et al.*, 2003), apple and pear (Hauagge & Cummins, 1991); the proposed CR  
259 based on a commercial requirement of bud break (e.g. 90%), could be applied in these temperate  
260 fruit species. The use of CR based on bud break for the assessment of regional suitability  
261 (determining the match of a growing area and cultivars or species) would minimize the  
262 productivity problems associated to the ‘residual effect of dormancy’, insufficient fulfilment of  
263 optimal chilling requirements. It would not be advisable to choose a CR-100%. A small  
264 percentage should be given as buffer for minor physiological problems or accidental bud drop  
265 during the manipulation of plant material on growth chambers.

266

### 267 *Chilling requirements calculation*

268 The chill accumulation necessary to reach 90% (CR<sub>m</sub>-90%) of flower bud break was found to  
269 be considerably higher than the chilling requirements estimated with the common forcing  
270 method (CR-50%) as shown in Table 1 (Dennis, 2003; Campoy *et al.*, 2011; Measham *et al.*,

271 2017). This reflects that the traditional assessment of chilling requirements may underestimate  
272 the real requirement to reach commercial productivity. In the case of commercially grown trees,  
273 the fulfilment of CR also needs to be “constant over years” to assure productivity and economic  
274 viability. Thus, this underestimation of CR is very important for both high and low chill  
275 cultivars in the context of climate change. The underestimation of CR could be considered  
276 trivial for temperate areas characterized by cold winters, when chill accumulation in the field  
277 normally exceeds the CR of cultivars, as both CR-50% and CR<sub>m</sub>-90% are easily achieved.  
278 However, climatic projections (Figs. 4 and 5, Luedeling *et al.*, 2011) for cold areas show that  
279 high-chill cultivars may experience productivity problems by the end of the century. For  
280 locations where CR of a given cultivar are rarely achieved, the use of CR-50% instead of CR<sub>m</sub>-  
281 90% will likely have a more significant impact. The underestimation of CR could lead to a  
282 higher probability and frequency of productivity problems due to insufficient chilling  
283 fulfilment. This is also true for low-chill cultivars that are grown in mild winter climates which  
284 are usually oriented to the profitable early-market (Egea *et al.*, 2010). In areas which are  
285 currently susceptible to insufficient chill, dormancy breaking agents can be used to compensate  
286 for insufficient chilling (Erez, 2000). Greater understanding of these agents ability to  
287 compensate for insufficient under climate change is required to understand if these provide an  
288 enduring adaptation strategy.

289 In the current climate change context, the risk of insufficient chill accumulation will increase.  
290 To more broadly understand the risk warming will pose to fruit tree production, we propose the  
291 evaluation of chilling requirements using higher percentages of bud break (around 90%) over a  
292 longer period under forcing conditions for crop with a high bloom load need for profitability.  
293 This approach should be undertaken to assess chilling requirements for the evaluation of new  
294 cultivars. This agrees with the work from Measham *et al.* (2017) on the impact of the method



295 for determining chill requirement on practical decision-making in the orchard, and on the  
296 assessment of regional suitability in warm-winter areas of Australia.

297

298 *Future production risk due to insufficient chill*

299 The projected chill accumulation data together with the projected bud break potential shown in  
300 this study provide new evidence of climate change risks for the cultivation of sweet cherry  
301 across Europe. This risk increases with the chilling requirement of the cultivar and the method  
302 used to calculate it (CR-50% or CR<sub>m</sub>-90%). In the Mediterranean basin (a marginal chill area),  
303 only extra-low chill cultivars, such as ‘Cristobalina’, will have regional suitability for its  
304 cultivation along the 21<sup>st</sup> century. However, for high-chill cultivars, regional suitability  
305 restriction is extended to almost the whole of the continental Europe, especially using the CRM-  
306 90% estimation (as shown in Figs. 4 and 5). Thus, the underestimation of chilling requirements  
307 together with the loss of chill in future time periods provide a warning message of the  
308 sustainability of temperate fruit production and urge breeders for the development of cultivars  
309 adapted to the upcoming climatic conditions. This is especially sound for species for which no  
310 low-chill cultivars have been bred so far, such as sweet cherry and apricot.

311

312 *Climate change: a shift in growing areas and cultivars.*

313 For the most pessimistic scenarios (rcp 8.5, Fig. 4), the projections show notable problems for  
314 chill fulfilment of high chill cultivars in areas currently considered as sufficiently cold, i.e.  
315 Northern Europe and British Isles. This highlights that high chill cultivars will need to be  
316 replaced with lower chill cultivars. Interestingly, new areas suitable for cultivars with relatively  
317 high chill requirements appear in North-Eastern Europe by the end the century. Although this  
318 may seem counterintuitive, most models of chill consider that temperatures below 0/-2°C are  
319 not effective for chill accumulation since they might inhibit all cellular functions (e.g. Fishman

320 *et al.*, 1987; Hänninen, 1990). Consequently, current climatic conditions are too cold to satisfy  
321 chill requirements will improve in suitability for chill accumulation and illustrates new  
322 production areas suitable for fruit tree cultivation.

323 Overall, this paper reveals that the method used to assess chilling requirements does have an  
324 important impact on the projection of regional and cultivar suitability of sweet cherry. The  
325 underestimation of CR due to experimental method could also have an important impact for the  
326 assessment of other temperate fruit crops, considering the similarity of methods used to assess  
327 CR and the analogy of dormancy and flowering processes. Therefore, this work highlights the  
328 need to carefully evaluate chill requirements in order to assess the future production risk and  
329 possible shifts in temperate fruit tree growing areas in Europe due to climate change.

330

### 331 **Acknowledgements**

332 The authors would like to acknowledge the E-OBS dataset from the EU-FP6 project  
333 ENSEMBLES (<http://ensembles-eu.metoffice.com>) and the data providers in the ECA&D  
334 project (<http://www.ecad.eu>). JAC was supported by CEP Innovation and Aquitaine Region  
335 (AQUIPRU project 2014-1R201022971). The authors warmly thank Teresa Barreneche,  
336 Hélène Christmann, Jacques Joly, Lydie Fouilhaux, Noémie Vimont and Rémi Beauvieux for  
337 collecting the branches and collaborating on the phenotyping. The authors thank the INRA's  
338 '*Prunus* Genetic Resources Center' for preserving and managing the sweet cherry collections  
339 and the Fruit Experimental Unit of INRA-Bordeaux (UEA) for growing the trees and managing  
340 the orchards.

341

### 342 **References**

343 Albuquerque N, García-Montiel F, Carrillo A, Burgos L (2008) Chilling and heat requirements

- 344 of sweet cherry cultivars and the relationship between altitude and the probability of satisfying  
345 the chill requirements. *Environmental and Experimental Botany*, **64**, 162–170.
- 346 Anderson J, Richardson E, Kesner C (1986) Validation of chill unit and flower bud phenology  
347 models for 'Montmorency' sour cherry. *Acta Horticulturae*, **184**, 71–78.
- 348 Andreini L, De Cortázar-Atauri IG, Chuine I et al. (2014) Understanding dormancy release in  
349 apricot flower buds (*Prunus armeniaca* L.) using several process-based phenological  
350 models. *Agricultural and Forest Meteorology*, **184**, 210–219.
- 351 Azizi Gannouni T, Campoy JA, Quero-García J, Barreneche T, Arif A, Albouchi A, Ammari Y  
352 (2017) Dormancy related traits and adaptation of sweet cherry in Northern Africa: A case  
353 of study in two Tunisian areas. *Scientia Horticulturae*, **219**, 272–279.
- 354 Campoy J a., Ruiz D, Egea J (2011) Dormancy in temperate fruit trees in a global warming  
355 context: A review. *Scientia Horticulturae*, **130**, 357–372.
- 356 Campoy JA, Ruiz D, Allderman L, Cook N, Egea J (2012) The fulfilment of chilling  
357 requirements and the adaptation of apricot (*Prunus armeniaca* L.) in warm winter  
358 climates: An approach in Murcia (Spain) and the Western Cape (South Africa). *European*  
359 *Journal of Agronomy*, **37**, 43–55.
- 360 Castède S, Campoy JA, Quero-García J et al. (2014) Genetic determinism of phenological  
361 traits highly affected by climate change in *Prunus avium*: flowering date dissected into  
362 chilling and heat requirements. *The New phytologist*, **202**, 703–15.
- 363 Chmielewski F-M, Götz K-P (2016) Performance of models for the beginning of sweet cherry  
364 blossom under current and changed climate conditions. *Agricultural and Forest*  
365 *Meteorology*, **218–219**, 85–91.
- 366 Chuine I, Bonhomme M, Legave J-M, García de Cortázar-Atauri I, Charrier G, Lacoïnte A,  
367 Améglio T (2016) Can phenological models predict tree phenology accurately in the  
368 future? The unrevealed hurdle of endodormancy break. *Global Change Biology*, **22**,

- 369 3444–3460.
- 370 Cook NC, Calitz FJ, Allderman LA, Steyn WJ, Louw ED (2017) Diverse patterns in  
371 dormancy progression of apple buds under variable winter conditions. *Scientia*  
372 *Horticulturae*, **226**, 307–315.
- 373 Couvillon GA, Erez A (1985) Influence of prolonged exposure to chilling temperatures on  
374 bud break and heat requirement for bloom of several fruit species. *J. Am. Soc. hort. Sci.*,  
375 **110**, 47–50.
- 376 Dantec CF, Vitasse Y, Bonhomme M, Louvet J-M, Kremer A, Delzon S (2014) Chilling and  
377 heat requirements for leaf unfolding in European beech and sessile oak populations at the  
378 southern limit of their distribution range. *International journal of biometeorology*, **58**,  
379 1853–1864.
- 380 Dennis F (2003) Problems in standardizing methods for evaluating the chilling requirements  
381 for the breaking of dormancy in buds of woody plants. *Hort Science*, **38**, 347–350.
- 382 Egea J, Ortega E, Martinez-Gomez P, Dicenta F (2003) Chilling and heat requirements of  
383 almond cultivars for flowering. *Environmental and Experimental Botany*, **50**, 79–85.
- 384 Egea J, Rubio M, Campoy JA et al. (2010) “Mirlo Blanco”, “Mirlo anaranjado”, and “Mirlo  
385 Rojo”: Three new very early-season apricots for the fresh market. *HortScience*, **45**,  
386 1893–1894.
- 387 Erez A (2000) Bud Dormancy; Phenomenon, Problems and Solutions in the Tropics and  
388 Subtropics. In: *Temperate Fruit Crops in Warm Climates*, pp. 17–48.
- 389 Erez A, Couvillon GA (1987) Characterization of the moderate temperature effect on peach  
390 bud rest. *J. Am. Soc. hort. Sci.*, **112**, 677–680.
- 391 Fadón E, Herrero M, Rodrigo J (2015) Flower development in sweet cherry framed in the  
392 BBCH scale. *Scientia Horticulturae*, **192**, 141–147.
- 393 Felker FC, Robitaille HA (1985) Chilling accumulation and rest of sour cherry flower buds. *J.*

- 394 *Am. Soc. Hortic. Sci.*, **110**, 227–232.
- 395 Fishman S, Erez A, Couvillon GA (1987) The temperature dependence of dormancy breaking  
396 in plants: Mathematical analysis of a two-step model involving a cooperative transition.  
397 *Journal of Theoretical Biology*, **124**, 473–483.
- 398 Götz KP, Chmielewski FM, Gödeke K et al. (2017) Assessment of amino acids during winter  
399 rest and ontogenetic development in sweet cherry buds (*Prunus avium* L.). *Scientia*  
400 *Horticulturae*, **222**, 102–110.
- 401 Hänninen H (1990) Modelling bud dormancy release in trees from cool and temperate  
402 regions. *Acta Forestalia Fennica*, **213**, 1–47.
- 403 Harrington CA., Gould PJ, St.Clair JB (2010) Modeling the effects of winter environment on  
404 dormancy release of Douglas-fir. *Forest Ecology and Management*, **259**, 798–808.
- 405 Hauagge R, Cummins JN (1991) Seasonal variation in intensity of bud dormancy in apple  
406 cultivars and related *Malus* species. *Journal of the American Society for Horticultural*  
407 *Science*, **116**, 107–115.
- 408 Haylock MR, Hofstra N, Klein Tank AMG, Klok EJ, Jones PD, New M (2008) A European  
409 daily high-resolution gridded data set of surface temperature and precipitation for 1950-  
410 2006. *Journal of Geophysical Research Atmospheres*, **113**, D20119.
- 411 Jacob D, Petersen J, Eggert B et al. (2014) EURO-CORDEX: New high-resolution climate  
412 change projections for European impact research. *Regional Environmental Change*, **14**,  
413 563–578.
- 414 Lang G, Early J, Martin G, Darnell R (1987) Endo-, para-, and ecodormancy: physiological  
415 terminology and classification for dormancy research. *Hort Science*, **22**, 371–377.
- 416 Laube J, Sparks TH, Estrella N, Höfler J, Ankerst DP, Menzel A (2014) Chilling outweighs  
417 photoperiod in preventing precocious spring development. *Global change biology*, **20**,  
418 170–82.

- 419 Luedeling E, Gassner A (2012) Partial Least Squares Regression for analyzing walnut  
420 phenology in California. *Agricultural and Forest Meteorology*, **158–159**, 43–52.
- 421 Luedeling E, Zhang M, Luedeling V, Girvetz EH (2009a) Sensitivity of winter chill models  
422 for fruit and nut trees to climatic changes expected in California’s Central Valley.  
423 *Agriculture, Ecosystems & Environment*, **133**, 23–31.
- 424 Luedeling E, Zhang M, Girvetz EH (2009b) Climatic changes lead to declining winter chill  
425 for fruit and nut trees in California during 1950-2099. *PLoS ONE*, **4**.
- 426 Luedeling E, Girvetz EH, Semenov MA., Brown PH (2011) Climate change affects winter  
427 chill for temperate fruit and nut trees. *PLoS ONE*, **6**.
- 428 Luedeling E, Kunz A, Blanke MM (2013) Identification of chilling and heat requirements of  
429 cherry trees-a statistical approach. *International journal of biometeorology*, **57**, 679–89.
- 430 Measham PF, Darbyshire R, Turpin SR, Murphy-White S (2017) Complexity in chill  
431 calculations: A case study in cherries. *Scientia Horticulturae*, **216**, 134–140.
- 432 Okie WR, Blackburn B (2011) Increasing chilling reduces heat requirement for floral  
433 budbreak in peach. *HortScience*, **46**, 245–252.
- 434 Petri JL, Leite GB (2004) Consequences of Insufficient Winter Chilling on Apple Tree Bud-  
435 break. *Acta Horticulturae*, **662**, 53–60.
- 436 Powell LE (1986) The chilling requirement in apple and its role in regulating time of  
437 flowering in spring in cold-winter climates. *Acta Horticulturae*, **179**, 1–11.
- 438 Romeu JF, Monforte AJ, Sánchez G, Granell A, García-Brunton J, Badenes ML, Ríos G  
439 (2014) Quantitative trait loci affecting reproductive phenology in peach. *BMC plant*  
440 *biology*, **14**, 52.
- 441 Ruiz D, Campoy JA, Egea J (2007) Chilling and heat requirements of apricot cultivars for  
442 flowering. *Environmental and Experimental Botany*, **61**, 254–263.
- 443 Ruiz D, Guevara-Gazquez A, García F, Carrilo-Navarro A, Cos-Terrer J (2017) New Japanese

- 444 plum (*Prunus salicina* L.) breeding program in Murcia (Spain). *Acta Horticulturae*,  
445 **1172**, 123–134.
- 446 Samish RM (1953) Dormancy in woody plants. *Annual Review of Plant Physiology*, **5**, 183–  
447 204.
- 448 Sánchez-Pérez R, Dicenta F, Martínez-Gómez P (2012) Inheritance of chilling and heat  
449 requirements for flowering in almond and QTL analysis. *Tree Genetics and Genomes*, **8**,  
450 379–389.
- 451 Saure M (1985) Dormancy release in deciduous fruit trees. *Horticultural reviews*, **7**, 239–299.
- 452 Spiegel-Roy P, Halston FH (1979) Chilling and Post-Dormant Heat Requirement as Selection  
453 Criteria for Late-Flowering Pears. *Journal of horticultural science*, **54**, 115–120.
- 454 Tabuenca M (1967) Necesidades de frío invernal de variedades de ciruelo. *An Aula Dei*, **8**,  
455 383–391.
- 456 Vitasse Y, Basler D (2014) Is the use of cuttings a good proxy to explore phenological  
457 responses of temperate forests in warming and photoperiod experiments? *Tree*  
458 *physiology*, **34**, 174–83.
- 459 Viti R, Bartolini S, Andreini L (2008) Apricot Flower Bud Development : Main Biological ,  
460 Physiological and Environmental Aspects Related to the Appearance of Anomalies.  
461 *International Journal of Plant Developmental Biology*, **2**, 25–34.
- 462 Viti R, Andreini L, Ruiz D, Egea J, Bartolini S, Iacona C, Campoy JA (2010) Effect of  
463 climatic conditions on the overcoming of dormancy in apricot flower buds in two  
464 Mediterranean areas: Murcia (Spain) and Tuscany (Italy). *Scientia Horticulturae*, **124**,  
465 217–224.
- 466 Vitra A, Lenz A, Vitasse Y (2017) Frost hardening and dehardening potential in temperate  
467 trees from winter to budburst. *New Phytologist*, **216**, 113–123.
